# Supplementary material for: Designing biodegradable alternatives to commodity polymers
Source: Royal Society of Chemistry journal article supplement (doi:10.1039/d3cs00556a), 2023-01-01
Supplement: d3cs00556a1.pdf [file d3cs00556a1.pdf]

## **Designing biodegradable alternatives to commodity polymers**

Emanuella F. Fiandra, Lloyd Shaw, Matthieu Starck, Christopher J. McGurk and Clare S. Mahon\*

*Department of Chemistry, Durham University, South Road, Durham, DH1 3LE, UK*

*E-mail: [clare.mahon@durham.ac.uk](mailto:clare.mahon@durham.ac.uk)*

**Table S1** Primary Organisation for Economic Co-operation and Development (OECD) biodegradation tests.<sup>1</sup>

| Standard / Method                                                                                                                                                                                                                                                                                | Inoculum                                                                                                                                                          | Temperature/ °C | Measurement type                                                                                                                                                                                                                                                                                                                 | Duration/ replicates                                                                                                                                       | Test material and validity criteria                                                                                                                                                                                                                                                                                                                                                                                                                                                                                                                                                                                 |
|--------------------------------------------------------------------------------------------------------------------------------------------------------------------------------------------------------------------------------------------------------------------------------------------------|-------------------------------------------------------------------------------------------------------------------------------------------------------------------|-----------------|----------------------------------------------------------------------------------------------------------------------------------------------------------------------------------------------------------------------------------------------------------------------------------------------------------------------------------|------------------------------------------------------------------------------------------------------------------------------------------------------------|---------------------------------------------------------------------------------------------------------------------------------------------------------------------------------------------------------------------------------------------------------------------------------------------------------------------------------------------------------------------------------------------------------------------------------------------------------------------------------------------------------------------------------------------------------------------------------------------------------------------|
| <b>301 A: Dissolved organic carbon (DOC) die-away test</b><br><b>301 B: CO<sub>2</sub> emission</b><br><b>301 C: Ministry of International Trade and Industry (MITI), Japan</b><br><b>301 D: Closed bottle</b><br><b>301 E: Modified OECD screening</b><br><b>301 F: Manometric respirometry</b> | Activated sludge from a sewage-treatment plant (predominantly domestic sewage), sewage effluents, surface water (rivers or lakes), soils or from mixture of these | 22 (±2)         | Determination of primary biodegradation under aerobic conditions<br><br>301 A and E: Determination of Dissolved Organic Carbon (DOC)<br>301 B: Theoretical CO <sub>2</sub> production (ThCO <sub>2</sub> )<br>301 C and F: Theoretical Oxygen Demand (ThOD)<br>301 D: O <sub>2</sub> consumption (Biological oxygen demand: BOD) | 28 days<br><br>Extended beyond 28 days if curves shown that biodegradation started but that the plateau has not been reached by day 28<br><br>2 replicates | Water-soluble organic compounds or mixture in water passing through a 0.45 µm filter<br><br>A material is considered <i>readily biodegradable</i> if 60% (for OECD 301 B-D and F) or 70% (for OECD301 A and E) of the degradation reached within a 10 day window and within 28 days total. The 10 day window is defined as beginning when 10% of the degradation is reached and ends after 10 days from this point (but before 28 full days of the test).<br><br>If materials fail, they may be tested using OECD 302                                                                                               |
| <b>302 A: Modified semi-continuous activated sludge (SCAS) test</b><br><b>302 B: Zahn-Wellens / EMPA test</b><br><b>302 C: MITI 2</b><br><b>302 D: Concawe Test</b>                                                                                                                              | Activated sludge in aqueous medium, soil                                                                                                                          | 20-25 (±1)      | Determination of inherent biodegradability under aerobic conditions<br><br>302 A-C: Determination of DOC and/or O <sub>2</sub> consumption (Chemical oxygen demand: COD)<br>302 D: Theoretical maximum Inorganic carbon production (ThIC)                                                                                        | Min: 28 days, max: 4 months<br><br>2 replicates                                                                                                            | Water-soluble organic compounds or mixture in water passing through a 0.45 µm filter<br><br>302 A-C: Biodegradation ≥ 20% may be regarded as evidence of inherent, primary biodegradability, biodegradation ≥ 70% may be regarded as evidence of inherent, ultimate biodegradability<br><br>302 D: Biodegradation ≥ 60 %, substance is inherently and ultimately degradable, biodegradation > 20 %, the substance is inherently, primary biodegradable. Biodegradation ≤ 20 % the substance is not inherently biodegradable in under the test condition<br><br>If materials fail, they may be tested using OECD 303 |
| <b>303 A: Activated sludge unit simulation</b><br><b>303 B: Biofilm simulation</b>                                                                                                                                                                                                               | Synthetic sewage, domestic sewage or activated sludge from plant or laboratory                                                                                    | 20-25 (±1)      | Determination of elimination and primary and/or ultimate biodegradation under aerobic conditions<br><br>Determination of DOC (or COD)                                                                                                                                                                                            | Min: 9 weeks, max: 12 weeks                                                                                                                                | Water-soluble organic compounds or mixture in water, passed through a 0.45 µm filter<br><br>Elimination and primary biodegradation observed if DOC or COD ≥ 80% after 2 weeks and no unusual observations have been made.<br><br>If degree of biodegradation is ≥ 90 %, test chemicals are deemed to be readily biodegradable                                                                                                                                                                                                                                                                                       |
| <b>306: Seawater</b><br><b>306 I: Shake flask method</b><br><b>306 II: Closed bottle method</b>                                                                                                                                                                                                  | Sea water                                                                                                                                                         | 15-20 (±2)      | Determination of the biodegradability of the test substance in the marine environment.<br><br>DOC (306 I) or ThOD (306 II)                                                                                                                                                                                                       | 306 I: 60 days<br>306 II: 28 days                                                                                                                          | Highly soluble (> 50 mg DOC/L), non-volatile, and non-adsorbing organic compounds<br><br>A positive result (> 70% DOC removal for the shake flask method, or > 60% of ThOD for the closed bottle method)                                                                                                                                                                                                                                                                                                                                                                                                            |

**Table S2** Standards for the assessment of biodegradation of plastics in aerobic environments issued by American Society for Testing and Materials (ASTM).

| Standard / Method     | Inoculum                                                                                                                                 | Temperature/ °C                        | Measurement type                                                                | Duration/replicates           | Test material and validity criteria                                                                                                                                                                                                                                                                                                                               |
|-----------------------|------------------------------------------------------------------------------------------------------------------------------------------|----------------------------------------|---------------------------------------------------------------------------------|-------------------------------|-------------------------------------------------------------------------------------------------------------------------------------------------------------------------------------------------------------------------------------------------------------------------------------------------------------------------------------------------------------------|
| <b>ASTM D5338-15</b>  | Compost from municipal solid waste                                                                                                       | 58 (±2)                                | CO <sub>2</sub> evolution                                                       | Max 45 days<br>3 replicates   | Plastic materials<br>≥ 70 % degradation of reference material and the deviation among the reference material replicates is less than 20 %                                                                                                                                                                                                                         |
| <b>ASTM D5988- 18</b> | Adapted or non-adapted soil, natural soil                                                                                                | 20-28 (±2)                             | CO <sub>2</sub> evolution                                                       | Max. 6 months<br>3 replicates | Plastic materials<br>≥ 70 % degradation of reference material. The measured CO <sub>2</sub> or the BOD values from the blanks at the end of the test are within 20 % of the mean                                                                                                                                                                                  |
| <b>ASTM D6400-23</b>  | A mixture of primary and secondary sludge that has been aerobically digested                                                             | 50-60 (±2)                             | CO <sub>2</sub> evolution                                                       | Max. 6 months                 | Plastics and products made from plastics<br>90 % of the organic carbon in the whole item shall be converted to CO <sub>2</sub> by the end of the test period when compared to the positive control or in the absolute                                                                                                                                             |
| <b>ASTM D6691- 17</b> | Preselected strains or seawater, synthetic medium                                                                                        | 30 (±2)                                | CO <sub>2</sub> evolution                                                       | Max. 3 months                 | Plastic materials including formulation additives<br>≥ 70 % degradation of reference material                                                                                                                                                                                                                                                                     |
| <b>ASTM D6868-21</b>  | Compost                                                                                                                                  | 58 (±2)                                | Visual evidence for degradation; loss of dry mass and CO <sub>2</sub> evolution | Max 6 months                  | Plastics or polymers incorporated to substrate and the entire end item is designed to be composted<br>≥ 90 % Disintegration during composting; 90% carbon converted to CO <sub>2</sub>                                                                                                                                                                            |
| <b>ASTM D6954-18</b>  | Soil, landfill, compost in which thermal oxidation may occur, and land cover and agricultural use in which photooxidation may also occur | Varies depending on in situ conditions | Visual evidence for degradation; loss of dry mass and CO <sub>2</sub> evolution | Not specified                 | Polymers<br>For homopolymers or statistical copolymers, 60% carbon must be converted to CO <sub>2</sub> before termination of the test.<br>For block copolymers, segmented copolymers, polymer blends, or where low molecular weight additives have been employed, 90% carbon must be converted to carbon dioxide, CO <sub>2</sub> before termination of the test |
| <b>ASTM D7991- 22</b> | Sediment and seawater                                                                                                                    | 15-28 (±2)                             | CO <sub>2</sub> evolution; static test conditions                               | Max 24 months<br>2 replicates | Plastic buried in sand<br>≥ 60 % degradation of reference material                                                                                                                                                                                                                                                                                                |

*Details of standards can be found in the ASTM test and standard database.<sup>2</sup>*

**Table S2** Standards for the assessment of biodegradation of plastics in anaerobic environments issued by ASTM.

| Standard / Method    | Inoculum                                                                                             | Temperature/ °C    | Measurement type                                                  | Duration and replicates       | Test material and Validity criteria                                                                                                                                                       |
|----------------------|------------------------------------------------------------------------------------------------------|--------------------|-------------------------------------------------------------------|-------------------------------|-------------------------------------------------------------------------------------------------------------------------------------------------------------------------------------------|
| <b>ASTM D5511-18</b> | Methanogenic inoculum derived from anaerobic digesters operating only on pre-treated household waste | 37 (±2) or 52 (±2) | Total carbon gas (CO <sub>2</sub> and CH <sub>4</sub> ) evolution | Max. 1 month<br>3 replicates  | Plastic materials in high-solids anaerobic conditions<br>≥ 70 % degradation of reference material and the deviation among the reference material replicates is less than 20 % of the mean |
| <b>ASTM D7475-20</b> | Methanogenic inoculum derived from anaerobic digesters operating only on pre-treated household waste | 35 (±2)            | Total carbon gas (CO <sub>2</sub> and CH <sub>4</sub> ) evolution | Max. 300 days<br>3 replicates | Plastic materials in an accelerated aerobic-anaerobic bioreactor landfill test environment                                                                                                |
| <b>ASTM D5526-18</b> | Methanogenic inoculum derived from anaerobic digesters operating only on pre-treated household waste | 35 (±2)            | Total carbon gas (CO <sub>2</sub> and CH <sub>4</sub> ) evolution | Max. 300 days<br>3 replicates | Plastic in an accelerated-landfill test environment                                                                                                                                       |

*Standards can be found on ASTM test and standard database.<sup>2</sup>*

**Table S3** Some examples of active standards for the assessment of biodegradation of plastics used in Europe.

| Standard / Method                    | Inoculum                                                                                                                                 | Temperature/ °C                         | Measurement type                                              | Duration/replicates      | Test material and Validity criteria                                                                                                                                                                                                                                                       |
|--------------------------------------|------------------------------------------------------------------------------------------------------------------------------------------|-----------------------------------------|---------------------------------------------------------------|--------------------------|-------------------------------------------------------------------------------------------------------------------------------------------------------------------------------------------------------------------------------------------------------------------------------------------|
| <b>BS 8472:2011<sup>a</sup></b>      | Soil, landfill, compost in which thermal oxidation may occur, and land cover and agricultural use in which photooxidation may also occur |                                         | CO <sub>2</sub> evolution<br>O <sub>2</sub> consumption (BOD) | 6 months<br>3 replicates | Natural or synthetic polymers, copolymers or mixtures, plastic materials with additives, water-soluble polymers<br>Requirement of ISO 17556                                                                                                                                               |
| <b>DIN EN 13432:2000<sup>b</sup></b> | Compost, soil or sludge Industrial compost                                                                                               | Varies depending on in situ conditions  | CO <sub>2</sub> evolution<br>Specification                    | 6 months                 | Packaging<br>≥90 % conversion of the carbon in the test polymer to CO <sub>2</sub> . The 90 % level set for biodegradation in the test accounts for a ± 10 % statistical variability of the experimental measurement                                                                      |
| <b>DIN EN 14987<sup>b</sup></b>      | Microbial inocula from municipal or industrial sewage sludge                                                                             | 25 (±2) cold water<br>60 (±2) hot water | CO <sub>2</sub> evolution                                     | 2 months                 | Water soluble plastic in cold or hot water<br>≥ 90 % of mineralisation degree or 90 % mineralisation degree reaches in the same time by the reference material, test in parallel (relative biodegradation ≥ 90 %). The reference material is soluble starch or microcrystalline cellulose |
| <b>DIN EN 14995:2006<sup>b</sup></b> | Soil, compost                                                                                                                            | 20-30 (±2)                              | CO <sub>2</sub> evolution<br>O <sub>2</sub> consumption (BOD) | 6 months                 | Plastic in non-packaging application<br>≥ 70 % degradation of reference material. The measured CO <sub>2</sub> or the BOD values from the blanks at the end of the test are within 20% of the mean                                                                                        |
| <b>DIN EN 17033:2018<sup>b</sup></b> | Soil, compost                                                                                                                            | 20-30 (±2)                              | CO <sub>2</sub> evolution                                     | 24 months                | Mulch film for use in agriculture and horticulture<br>≥90 % conversion of the carbon in the test polymer to CO <sub>2</sub> . The 90 % level set for biodegradation in the test accounts for a ± 10 % statistical variability of the experimental measurement                             |

*a. Tests and standards issued by British Standard Institution.<sup>3,4</sup>*

*b. Tests and standards issued by DIN<sup>5</sup> at the national level. Affix "EN" corresponds to standards and test approved at the regional level by the European Committee for Standardization (CEN).<sup>6</sup>*

**Table S4** Active standards for the assessment of biodegradation of plastics in aerobic environments issued by International Standards Organisation (ISO).

| Standard / Method     | Inoculum                                                                                                                                 | Temperature/ °C     | Measurement type                                                  | Duration/replicates       | Test material and validity criteria                                                                                                                                                                                                                                                                                                                                                                                                                        |
|-----------------------|------------------------------------------------------------------------------------------------------------------------------------------|---------------------|-------------------------------------------------------------------|---------------------------|------------------------------------------------------------------------------------------------------------------------------------------------------------------------------------------------------------------------------------------------------------------------------------------------------------------------------------------------------------------------------------------------------------------------------------------------------------|
| <b>ISO 14851:2016</b> | Activated sludge from a sewage-treatment plant predominantly domestic sewage                                                             | 20-25 ( $\pm 1$ )   | O <sub>2</sub> consumption (BOD)                                  | 6 months<br>3 replicates  | Plastic materials<br><br>≥ 60% degradation of reference material at the end of the test. BOD of negative control must not exceed a specified upper limit                                                                                                                                                                                                                                                                                                   |
| <b>ISO 14852:2021</b> | Activated sludge from a sewage-treatment plant predominantly domestic sewage, Soil and/or compost                                        | 20-25 ( $\pm 1$ )   | CO <sub>2</sub> evolution                                         | 6 months<br>3 replicates  | Plastic materials<br><br>≥ 60% degradation of reference material at the end of the test. CO <sub>2</sub> evolved from negative control must not exceed a specified upper limit                                                                                                                                                                                                                                                                             |
| <b>ISO 14855</b>      | Compost                                                                                                                                  | 58 ( $\pm 2$ )      | CO <sub>2</sub> evolution                                         | 6 months                  | Natural or synthetic polymers, copolymers or mixtures, plastic materials with additives, water-soluble polymers<br><br>>70% of biodegradation after 45 days. The difference between the percentage of the reference material in the different vessels is <20% at the end of the test. The inoculum in the blank has produced more than 50 mg but less than 150 mg of CO <sub>2</sub> per gram of volatile solids (mean values) after 10 days of incubation |
| <b>ISO 17556:2019</b> | Soil, landfill, compost in which thermal oxidation may occur, and land cover and agricultural use in which photooxidation may also occur | 25 ( $\pm 2$ )      | CO <sub>2</sub> evolution<br><br>O <sub>2</sub> consumption (BOD) | 24 months                 | Natural or synthetic polymers, copolymers or mixtures, plastic materials with additives, water-soluble polymers<br><br>≥60% degradation of reference material and the measured CO <sub>2</sub> or the BOD values from the blanks at the end of the test are within 20% of the mean                                                                                                                                                                         |
| <b>ISO 18830:2016</b> | Marine sandy sediment at the interface between seawater and the seafloor from sublittoral zone                                           | 15 – 25 ( $\pm 2$ ) | O <sub>2</sub> consumption (BOD)                                  | 24 months<br>3 replicates | Non-floating plastic<br><br>>60 % degradation of reference material; BOD of negative control must not exceed a specified upper limit                                                                                                                                                                                                                                                                                                                       |
| <b>ISO 19679:2016</b> | marine sandy sediment at the interface between seawater and the seafloor from sublittoral zone                                           | 15 – 25 ( $\pm 2$ ) | CO <sub>2</sub> evolution                                         | 24 months<br>3 replicates | Non floating plastic<br><br>≥ 60% degradation of reference material at the end of the test. CO <sub>2</sub> evolved from negative control must not exceed a specified upper limit                                                                                                                                                                                                                                                                          |

*Standards can be found on the ISO test and standard database.<sup>7</sup>*

**Table S6** Active standards for the assessment of biodegradation of plastics in anaerobic environments issued by ISO.

| Standard / Method     | Inoculum                                                                                                                                   | Temperature/ °C    | Measurement type                              | Duration and replicates  | Test material and Validity criteria                                                                                                          |
|-----------------------|--------------------------------------------------------------------------------------------------------------------------------------------|--------------------|-----------------------------------------------|--------------------------|----------------------------------------------------------------------------------------------------------------------------------------------|
| <b>ISO 13975</b>      | Sludge, livestock faeces or other organic waste                                                                                            | 35 (±3) or 55 (±5) | CO <sub>2</sub> and CH <sub>4</sub> evolution | 3 months<br>2 replicates | Plastic materials<br>>70% degradation of reference material after 15 days; extent of degradation (%) must differ by <20 % between replicates |
| <b>ISO 14853:2016</b> | Sludge                                                                                                                                     | 35 (±3)            | CO <sub>2</sub> and CH <sub>4</sub> evolution | 3 months<br>2 replicates | Plastic materials<br>>70% degradation of reference material; pH of medium must remain between 6 and 8                                        |
| <b>ISO 15985:2014</b> | Methanogenic inoculum derived from anaerobic digesters operating only on pre-treated household waste, preferably only the organic fraction | 52 (±2)            | CO <sub>2</sub> and CH <sub>4</sub> evolution | 4 months<br>3 replicates | Plastic materials<br>>70% degradation of reference material after 15 days; extent of degradation (%) must differ by <20% between replicates  |

*Standards can be found on the ISO test and standard database.<sup>7</sup>*

**Table S7** Microorganisms and the enzymes involved in the biodegradation process of polymers and their constituent monomers.<sup>8,9</sup>

| Enzyme class                     | Microbes                      | Polymers                                           |
|----------------------------------|-------------------------------|----------------------------------------------------|
| Cutinase <sup>10, 11</sup>       | Bacteria, fungi               | Polyesters, polyurethanes, polyethylene            |
| Dioxygenase <sup>12, 13</sup>    | Fungi                         | Polystyrene, polyethylene, Polyester               |
| Esterase <sup>14, 15</sup>       | Bacteria, fungi               | Polyesters, polyurethanes, polyolefins             |
| Hydrolase <sup>16</sup>          | Yeast, fungi                  | Polyesters, polyurethanes, polyamides, polyolefins |
| Hydroxylase <sup>17</sup>        | Actinomycetal fungi, bacteria | Polyolefins                                        |
| Laccase <sup>18, 19</sup>        | Fungi                         | Polyolefins, polyurethanes                         |
| Lipase <sup>20</sup>             | Bacteria, fungi, yeast        | Polyesters, polyurethanes, polyolefins             |
| Polyurethanase <sup>21, 22</sup> | Bacteria, fungi               | Polyurethanes                                      |
| Protease <sup>23, 24</sup>       | Bacteria, fungi, yeast        | Polyesters, polyurethanes                          |

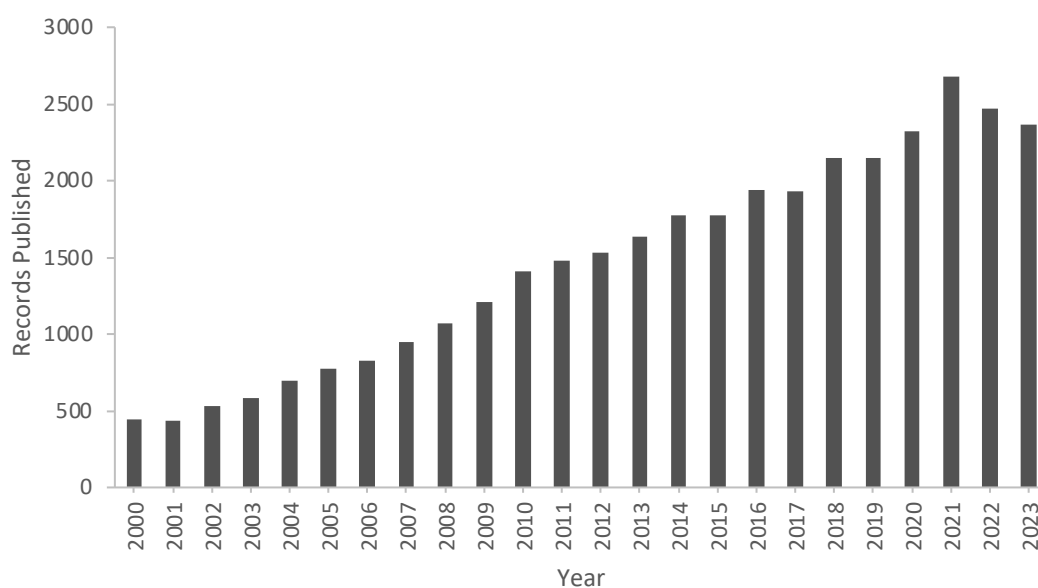

**Figure S1** The number of records published each year with the keyword 'biodegradable polymers' in the title (Web of Science 02-06-2000 to 02-06-2023).



**Table S5** Analytical methods used to evaluate the degradation processes of polymers. Adapted from Sun *et al.*,<sup>8</sup> Solanki *et al.*,<sup>9</sup> and Baidurah *et al.*<sup>25</sup>

| Technique                                    | Principle                                                                                                                                  | Advantages                                                             | Disadvantages                                                                                                                                                                         | Reference                                                                       |
|----------------------------------------------|--------------------------------------------------------------------------------------------------------------------------------------------|------------------------------------------------------------------------|---------------------------------------------------------------------------------------------------------------------------------------------------------------------------------------|---------------------------------------------------------------------------------|
| FTIR                                         | Identification of functional groups                                                                                                        | Identify affected bonds<br>Rapid and simple to use                     | Sample extraction prior to analysis required<br>Additives present will cause discrepancies                                                                                            | Yu <i>et al.</i> <sup>26</sup>                                                  |
| GPC                                          | Average molecular weights;<br>molecular weight distributions                                                                               | Direct proof of fragmentation                                          | Suitable only as a complementary technique                                                                                                                                            | Yang <i>et al.</i> <sup>27</sup>                                                |
| SEM                                          | Identify surface deterioration by<br>changes in polymer surface<br>morphology                                                              | Minimal sample preparation<br>Relatively quick to run and analyse data | Expensive<br>Artifacts possible<br>Limited for lab use as requires a vacuum environment<br>Sample needs to be a solid<br>Microbial support and biofilm effect may cause discrepancies | Nisa <i>et al.</i> <sup>28</sup>                                                |
| Radio labelling                              | Radioactive isotope tracking e.g., <sup>14</sup> C<br>and <sup>3</sup> H to track the formation of CO <sub>2</sub><br>and H <sub>2</sub> O | Identify metabolites and degradative pathways<br>Non-destructive       | Restrictive for field studies<br>Expensive to produce tracer in sufficient quantities<br>Environmental radiative hazardous                                                            | Réjasse <i>et al.</i> <sup>29</sup><br>Zumstein <i>et al.</i> <sup>30, 31</sup> |
| Comparison to ISO, ECS<br>and ASTM standards | Gas (CO <sub>2</sub> ) emitted from degradation                                                                                            | Universal<br>Simple                                                    | Challenging for aquatic systems<br>Difficult for use in field studies<br>Discrepancies may be caused by other materials                                                               | Beran <i>et al.</i> <sup>32</sup>                                               |

FTIR: Fourier Transform Infrared Spectroscopy; GPC: Gel Permeation Chromatography; SEM: Scanning Electron Microscopy; SEM: Scanning Electron Microscopy; ISO: International Standard Organisation; ECS: European Committee for Standardisation; ASTM: American Society for Testing and Materials.

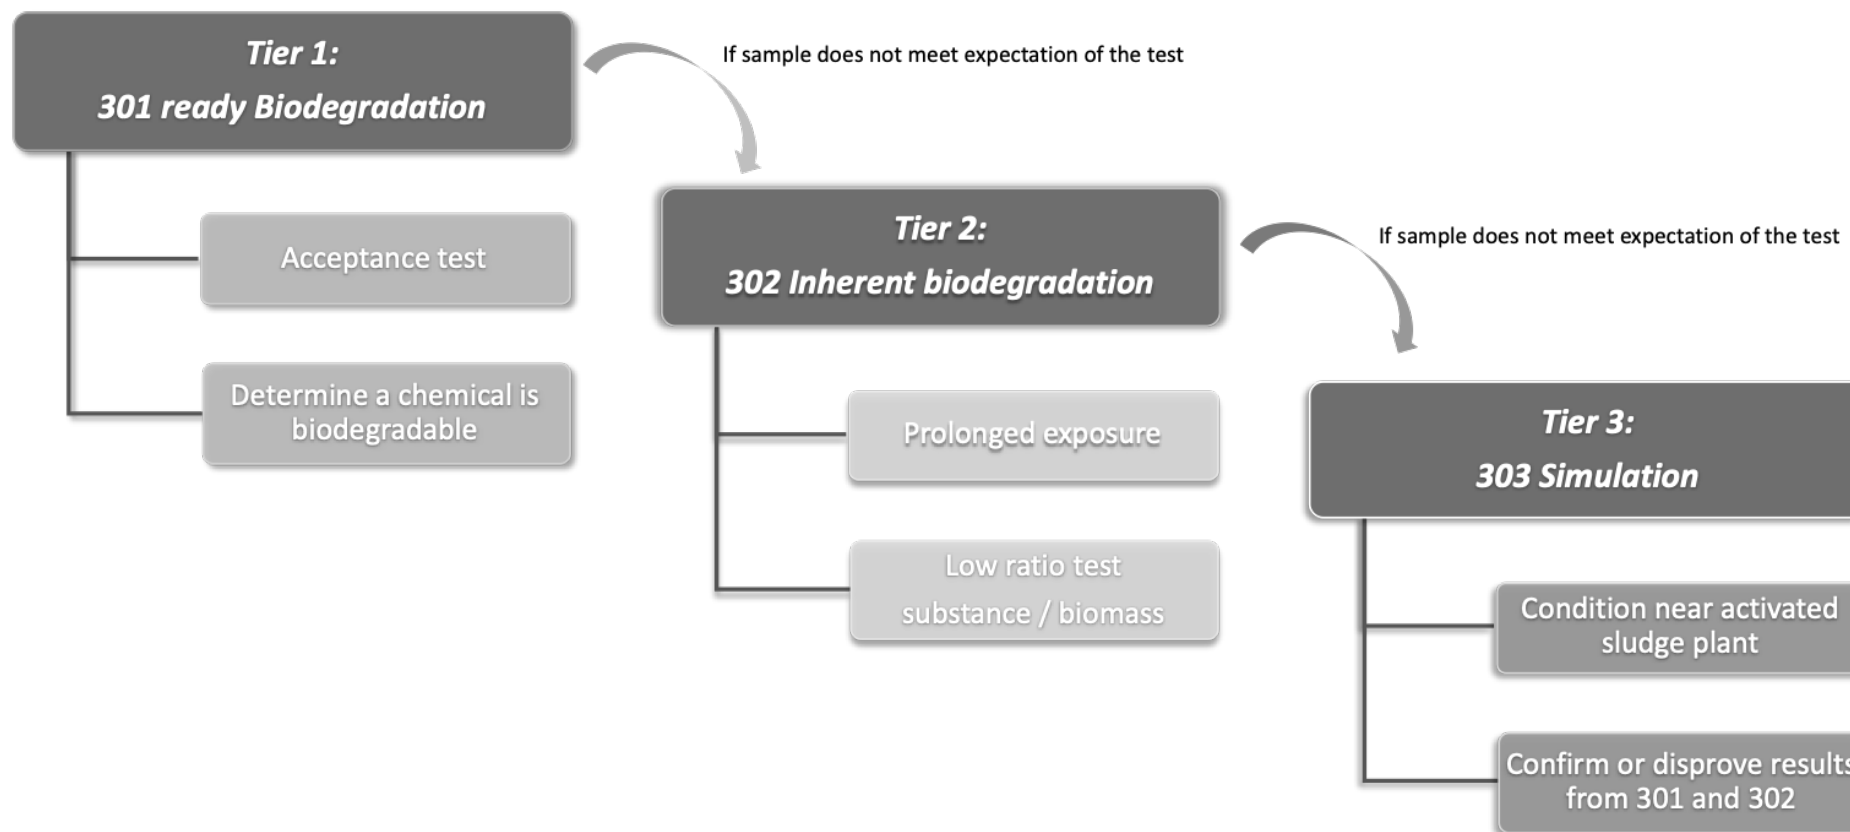

**Figure S2** Principles of the tiered OECD biodegradation testing system.<sup>33</sup>

Tests 301 and 302 examine ready and inherent biodegradability, usually using a high substance to inoculum ratio, whilst test 303 examine simulated biodegradation, aiming to reproduce activated sludge treatment process. Failure to pass tests 301 and 302 does not lead to rejection – samples failing these tests could be demonstrated to be biodegradable using other inoculum, and/or longer exposure. Test 303 should be used for any samples that do not pass test 301 and 302. If a material is not shown to be biodegradable via test 303, an environment risk assessment can be performed.

In addition to OECD tests above, simulated biodegradation tests have been developed by OECD using radiolabelled test samples to study aerobic and anaerobic transformations in soil (OECD 307)<sup>34</sup> or in aquatic sediment systems (OECD 308)<sup>35</sup> and the aerobic mineralisation in surface water (OECD 309)<sup>36</sup>. The guideline methods for determining the extent and kinetics of primary and ultimate biodegradation of organic chemicals whose entry into the environment begins by discharge to wastewater is described on OECD 314.<sup>37</sup>

## References

1. Organisation for Economic Co-operation and Development, *OECD Guidelines for Testing of Chemicals, Section 3*, OECD Publishing, Paris, 2006.
2. American Society for Testing and Materials, Standards & Publications, <https://www.astm.org/products-services/standards-and-publications.html>).
3. A. Kjeldsen, M. Price, C. Lilley, E. Guzniczak and I. Archer, *A Review of Standards for Biodegradable Plastics*, Industrial Biotechnology Innovation Centre, 2018.
4. British Standard Institution, <https://www.bsigroup.com/en-GB/>).
5. Deutsches Institut für Normung, <https://www.din.de/en>).
6. European Comitee for Standardization, <https://www.cencenelec.eu/>).
7. The International Organization for Standardization, ISO - Standards, <https://www.iso.org/standards.html>).
8. Y. Sun, J. Hu, A. Yusuf, Y. Wang, H. Jin, X. Zhang, Y. Liu, Y. Wang, G. Yang and J. He, *Biodegradation*, 2022, **33**, 1-16.
9. S. Solanki, S. Sinha and R. Singh, *Biodegradation*, 2022, **33**, 529-556.
10. S. Chen, X. Tong, R. W. Woodard, G. Du, J. Wu and J. Chen, *J. Biol. Chem.*, 2008, **283**, 25854-25862.
11. M. Furukawa, N. Kawakami, A. Tomizawa and K. Miyamoto, *Sci. Rep.*, 2019, **9**, 16038.
12. J. K. Mahto, N. Neetu, M. Sharma, M. Dubey, B. P. Vellanki and P. Kumar, *J. Bacteriol.*, 2022, **204**, e00543-00521.
13. Y. Zhang, J. N. Pedersen, B. E. Eser and Z. Guo, *Biotechnol. Adv.*, 2022, **60**, 107991.
14. R. A. Wilkes and L. Aristilde, *J. Appl. Microbiol.*, 2017, **123**, 582-593.
15. G. T. Howard, *Int. Biodeterior. Biodegrad.*, 2002, **49**, 245-252.
16. A. N. Johnson, D. E. Barlow, A. L. Kelly, V. A. Varaljay, W. J. Crookes-Goodson and J. C. Biffinger, *Polym. Int.*, 2021, **70**, 977-983.
17. J.-M. Jeon, S.-J. Park, T.-R. Choi, J.-H. Park, Y.-H. Yang and J.-J. Yoon, *Polym. Degrad. Stab.*, 2021, **191**, 109662.
18. M. Santo, R. Weitsman and A. Sivan, *Int. Biodeterior. Biodegrad.*, 2013, **84**, 204-210.
19. A. Magnin, L. Entzmann, E. Pollet and L. Avérous, *Waste Manage.*, 2021, **132**, 23-30.
20. N. Mohanan, C. H. Wong, N. Budisa and D. B. Levin, *Front. Bioeng. Biotechnol.*, 2022, **10**.
21. K. Masaki, *Appl. Microbiol. Biotechnol.*, 2022, **106**, 3431-3438.
22. Y. Branson, S. Sörtl, C. Buchmann, R. Wei, L. Schaffert, C. P. S. Badenhorst, L. Reisky, G. Jäger and U. T. Bornscheuer, *Angew. Chem. Int. Ed.*, 2023, **62**, e202216220.
23. X. Qi, Y. Ren and X. Wang, *Int. Biodeterior. Biodegrad.*, 2017, **117**, 215-223.
24. A. Loredo-Treviño, G. Gutiérrez-Sánchez, R. Rodríguez-Herrera and C. N. Aguilar, *J. Polym. Environ.*, 2012, **20**, 258-265.
25. S. Baidurah, *Polymers*, 2022, **14**, 4928.
26. C. Yu, B. Dongsu, Z. Tao, J. Xintong, C. Ming, W. Siqi, S. Zheng and Z. Yalei, *Sci. Total Environ.*, 2023, **859**, 159967.
27. Y. Yang, J. Yang, W.-M. Wu, J. Zhao, Y. Song, L. Gao, R. Yang and L. Jiang, *Environ. Sci. Technol.*, 2015, **49**, 12080-12086.
28. S. A. Nisa, R. Vasantharaja, S. Supriya, D. Inbakandan, G. Dharani and K. Govindaraju, *Mar. Pollut. Bull.*, 2023, **188**, 114682.
29. A. Réjasse, J. Waeytens, A. Deniset-Besseau, N. Crapart, C. Nielsen-Leroux and C. Sandt, *Environ. Sci. Technol.*, 2022, **56**, 525-534.
30. M. Zumstein, G. Battagliarin, A. Kuenkel and M. Sander, *Acc. Chem. Res.*, 2022, **55**, 2163-2167.
31. M. T. Zumstein, A. Schintlmeister, T. F. Nelson, R. Baumgartner, D. Woebken, M. Wagner, H.-P. E. Kohler, K. McNeill and M. Sander, *Sci. Adv.*, 2018, **4**, eaas9024.
32. E. Beran, S. Hull and M. Steininger, *J. Polym. Environ.*, 2013, **21**, 172-180.
33. Organisation for Economic Co-operation and Development, *Revised Introduction to the OECD Guidelines for Testing of Chemicals, Section 3*, 2006.

34. Organisation for Economic Co-operation and Development, *Test No. 307: Aerobic and Anaerobic Transformation in Soil*, 2002.
35. Organisation for Economic Co-operation and Development, *Test No. 308: Aerobic and Anaerobic Transformation in Aquatic Sediment Systems*, 2002.
36. Organisation for Economic Co-operation and Development, *Test No. 309: Aerobic Mineralisation in Surface Water – Simulation Biodegradation Test*, 2004.
37. Organisation for Economic Co-operation and Development, *Test No. 314: Simulation Tests to Assess the Biodegradability of Chemicals Discharged in Wastewater*, 2008.
